# Supplementary material for: Scoping review: the current landscape of NIPT in South Africa
Source: J Community Genet. 2025 May 28;16(3):227–41. doi: 10.1007/s12687-025-00802-6 (PMC12202265; doi:10.1007/s12687-025-00802-6)
Supplement: Supplementary file 1 — Supplementary file1 (XLSX 45 KB) [file 12687_2025_802_MOESM1_ESM.xlsx]

## Sheet: Copy of Articles 1
	Title	Year
1	Multisite assessment of the impact of cell-free DNA-based screening for rare autosomal aneuploidies on pregnancy management and outcomes	2022
2	The value and role of non-invasive prenatal testing in a select South African population	2016
3	Appropriate clinical use of non-invasive prenatal testing in South Africa	2014
4	Challenges and Controversies in Prenatal Genetic Screening in the South African Context	2018
5	Clinical application of a contingent screening strategy for trisomies with cell-free DNA: a pilot study	2019
6	Clinical outcomes of screen-positive genomewide cfDNA cases for trisomy 20: results from the global expanded NIPT Consortium	2024
7	Clinical, social and ethical issues associated with non-invasive prenatal testing for aneuploidy	2018
8	Equity in prenatal healthcare services globally: an umbrella review	2024
9	Factors affecting the uptake of prenatal screening tests for congenital anomalies; a multicentre prospective cohort study	2014
10	Improving women’s knowledge about prenatal screening in the era of non-invasive prenatal testing for Down syndrome – development and acceptability of a low literacy decision aid	2018
11	Indications, types, and diagnostic implications of prenatal genetic testing in Sub-Saharan Africa: A descriptive study	2023
12	Non-Invasive Prenatal Genetic Testing: A Study of Public Attitudes	2012
13	Non-Invasive Prenatal Testing (NIPT): Reliability, Challenges, and Future Directions	2023
14	Toward an Ethically Sensitive Implementation of Noninvasive Prenatal Screening in the Global Context	2017
15	A two-year experience of non-invasive prenatal testing (NIPT) at an urban tertiary medical center in South Korea	2019
16	Building a Progressive Reproductive Law in South Africa	2023
17	Global perspectives on clinical adoption of NIPT	2015
18	Non-invasive prenatal testing: a review of international implementation and challenges	2015
19	Non-invasive prenatal diagnosis from the perspective of a low-resource country	2013
20	Noninvasive Prenatal Genetic Testing: Current and Emerging Ethical, Legal, and Social Issues	2015
21	The Emergence and Global Spread of Noninvasive Prenatal Testing	2021
22	Could Digital PCR Be an Alternative as a NonInvasive Prenatal Test for Trisomy 21: A Proof of Concept Study	2016
23	Genomics-based non-invasive prenatal testing for detection of fetal chromosomal aneuploidy in pregnant women (Cochrane Review)	2017
24	Clinical implementation of NIPT – technical and biological challenges	2016
25	Non-Invasive Prenatal Testing: Review of Ethical, Legal and Social Implications	2016
26	Noninvasive prenatal testing for trisomy 21: Challenges for implementation in Australia	2013
27	Non-invasive Prenatal Testing: Technologies, Clinical Assays and Implementation Strategies for Women’s Healthcare Practitioners	2013
28	Non-Invasive Prenatal Testing: Current Perspectives and Future Challenges	2020
29	Cell-free DNA noninvasive prenatal screening for aneuploidy versus conventional screening: A systematic review of economic evaluations	2017
